# Supplementary material for: Hierarchically structured tetragonal zirconia as a promising support for robust Ni based catalysts for dry reforming of methane
Source: Royal Society of Chemistry journal article supplement (doi:10.1039/c6ra12457g), 2016-01-01
Supplement: c6ra12457g1.pdf [file c6ra12457g1.pdf]

Supplementary Material (ESI) for RSC Advances  
This journal is (c) The Royal Society of Chemistry 2016

## Electronic Supplementary Information

### Hierarchically-structured tetragonal zirconia as promising support for robust Ni based catalyst for dry reforming of methane

Weizuo Li and Zhongkui Zhao\*

State Key Laboratory of Fine Chemicals, Department of Catalysis Chemistry and Engineering, School of Chemical Engineering, Dalian University of Technology, Dalian 116024, P.R. China. E-mail: zkzhao@dlut.edu.cn; Fax: +86-411-84986354.

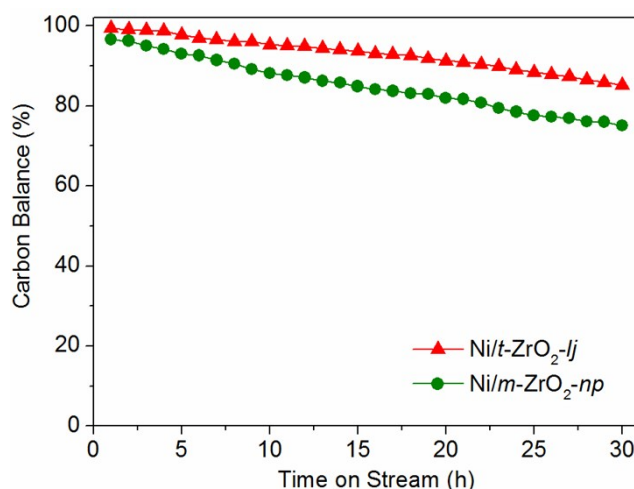

**Figure S1.** The carbon balance curves for the effluent over Ni/t-ZrO<sub>2</sub>-lj and Ni/m-ZrO<sub>2</sub>-np catalysts as a function of time on stream.
